# Supplementary material for: Magnetically actuated superparamagnetic liposomes for accurate photothermal therapy and in situ antitumor immunoactivation
Source: Royal Society of Chemistry journal article supplement (doi:10.1039/d5bm00279f), 2025-01-01
Supplement: d5bm00279f1.pdf [file d5bm00279f1.pdf]

## Supporting Information

Table S1. The encapsulation efficiency of Lipo-IONs.

| Sampel | $C_{\text{total}}(\mu\text{g/mL})$ | $C_{\text{without free SPIONs}}(\mu\text{g/mL})$ | Encapsulation rate |
|--------|------------------------------------|--------------------------------------------------|--------------------|
| 1      | 26.4753                            | 22.5294                                          | 85.10%             |
| 2      | 26.5734                            | 22.5411                                          | 84.83%             |
| 3      | 26.4731                            | 22.5258                                          | 85.09%             |

**Table S1.** The encapsulation efficiency of IONs in Lipo-IONs. The encapsulation efficiency (EE) was determined as follows: The Lipo-IONs suspension was transferred into a 300 kDa molecular weight cut-off ultrafiltration tube and centrifuged at  $3000 \times g$  for 20 minutes to separate the free SPIONs. The iron content in both the original suspension and the upper suspension was quantified using inductively coupled plasma optical emission spectrometry (ICP-OES, 5110, Agilent, USA).

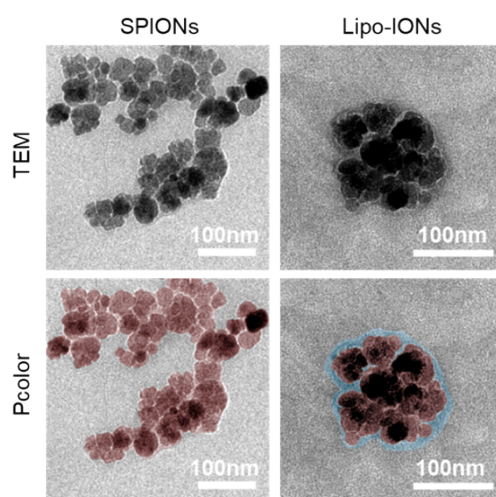

**Figure S1.** TEM images of SPIONs and Lipo-IONs, suggesting that SPIONs was effectively encapsulated in liposomes. To more clearly demonstrate that SPIONs are encapsulated in liposomes, we carried out pseudo-color processing (Pcolor).

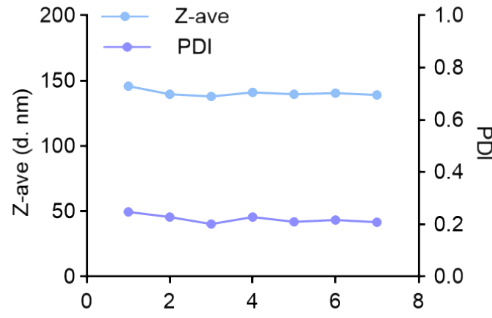

**Figure S2.** The stability evaluation of Lipo-IONs: the data was obtained from dynamic light scattering (DLS) over 7 days, demonstrating the negligible variation (<10%) in hydrodynamic diameter ( $140 \pm 5$  nm).

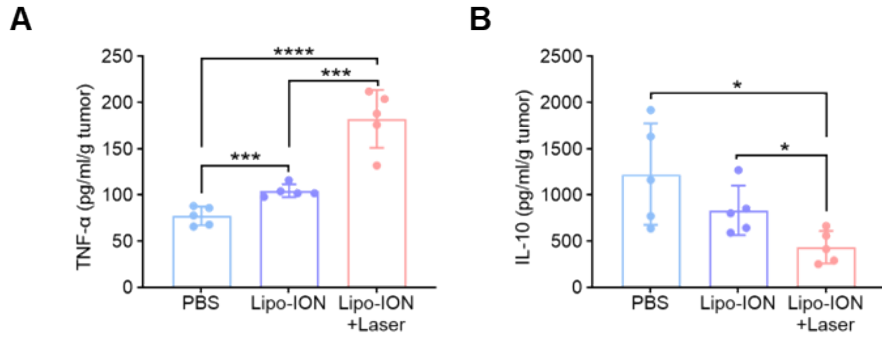

**Figure S3.** ELISA analysis of inflammatory cytokines in tumor tissues. (A) The level of IL-10 (an anti-inflammatory cytokine) in tumor tissues, indicating the significant decrease in the Lipo-ION+Laser group ( $P^{***} < 0.001$ ). (B) The TNF-α (a pro-inflammatory cytokine) level in tumor tissues, showing a great increase in the Lipo-ION+Laser group compared to other groups ( $P^{*} < 0.05$ ).
